# Regulation of the Poly(A) Status of Mitochondrial mRNA by Poly(A)-Specific Ribonuclease Is Conserved among Land Plants

Mai Kanazawa<sup>1,6</sup>, Yoko Ikeda<sup>1,2,6</sup>, Ryuichi Nishihama<sup>3</sup>, Shohei Yamaoka<sup>3</sup>, Nam-Hee Lee<sup>4</sup>, Katsuyuki T. Yamato<sup>5</sup>, Takayuki Kohchi<sup>3</sup> and Takashi Hirayama<sup>1,2,\*</sup>

<sup>1</sup>Division of Science for Bioresources, Graduate School of Environment and Life Science, Okayama University, 2-20-1 Chuo, Kurashiki, 710-0046 Japan

<sup>2</sup>Institute of Plant Science and Resources, Okayama University, 2-20-1 Chuo, Kurashiki, 710-0046 Japan

<sup>3</sup>Graduate School of Biostudies, Kyoto University, Kitashirakawa Oiwake-cho, Sakyo-ku, Kyoto, 606-8502 Japan

<sup>4</sup>Department of Life Sciences, Faculty of Science and Engineering, Sorbonne University, 4 Place Jussieu, Paris 75005, France

<sup>5</sup>Department of Biotechnological Science, Faculty of Biology-Oriented Science and Technology, Kindai University, 930 Nishimitani, Kinokawa, Wakayama, 649-6493 Japan

<sup>6</sup>These authors contributed equally to this work

\*Corresponding author: E-mail, [hira-t@okayama-u.ac.jp](mailto:hira-t@okayama-u.ac.jp); Fax, +81-86-434-1213.

(Received September 12, 2019; Accepted November 8, 2019)

Regulation of the stability and the quality of mitochondrial RNA is essential for the maintenance of mitochondrial and cellular functions in eukaryotes. We have previously reported that the eukaryotic poly(A)-specific ribonuclease (PARN) and the prokaryotic poly(A) polymerase encoded by *AHG2* and *AGS1*, respectively, coordinately regulate the poly(A) status and the stability of mitochondrial mRNA in *Arabidopsis*. Mitochondrial function of PARN has not been reported in any other eukaryotes. To know how much this PARN-based mitochondrial mRNA regulation is conserved among plants, we studied the *AHG2* and *AGS1* counterparts of the liverwort, *Marchantia polymorpha*, a member of basal land plant lineage. We found that *M. polymorpha* has one ortholog each for *AHG2* and *AGS1*, named *MpAHG2* and *MpAGS1*, respectively. Their Citrine-fused proteins were detected in mitochondria of the liverwort. Molecular genetic analysis showed that *MpAHG2* is essential and functionally interacts with *MpAGS1* as observed in *Arabidopsis*. A recombinant *MpAHG2* protein had a deadenylase activity in vitro. Overexpression of *MpAGS1* and the reduced expression of *MpAHG2* caused an accumulation of polyadenylated *Mpcox1* mRNA. Furthermore, *MpAHG2* suppressed *Arabidopsis ahg2-1* mutant phenotype. These results suggest that the PARN-based mitochondrial mRNA regulatory system is conserved in land plants.

**Keywords:** *Arabidopsis* • *Marchantia polymorpha* • Mitochondria • Poly(A) polymerase • Poly(A) regulation • Poly(A)-specific ribonuclease.

## Introduction

Regulation of gene expression is a fundamental system of life. Gene expression is controlled at various levels, namely at the transcriptional, post-transcriptional, translational and post-translational levels. It has been widely accepted that RNA is one of the most important biological materials in the gene expression regulation. RNA itself has an ability to transfer genetic information from genomic DNA as translatable mRNA, to build

functional structures alone or interact with proteins and to regulate gene expressions by means of microRNAs (Filipowicz et al. 2008). Regarding the prominence of these RNAs, all the types of RNA molecules in the cell are believed to be under tight regulation at both their quantity and quality (Houseley et al. 2006, Isken and Maquat 2007). Poly(A) sequence attached at the 3' end of RNA has a pivotal role in the RNA regulatory system. Poly(A) tail bound with poly(A)-binding proteins constitutes the base for stable mRNA-protein complex composed with eIF4E and eIF4G (Wilkie et al. 2003, Goldstrohm and Wickens 2008). Once poly(A) tail is shortened by deadenylases, RNA-protein complex becomes unstable and accessible by various RNases, and mRNA is degraded. On the other hand, poly(A) functions as a degradation tag for RNA in prokaryotes and functional RNAs, such as tRNA or rRNAs in eukaryotes (Houseley et al. 2006).

Eukaryotes have, at least, three types of deadenylases, such as CCR4-NOT-CAF1 complex, PAN2-PAN3 and poly(A)-specific ribonuclease (PARN). The poly(A) status of cytoplasmic mRNA is mainly regulated by the CCR4-NOT-CAF1 and PAN2-PAN3 complexes (Chen and Shyu 2011). PARN is widely distributed in eukaryotes but is not found in budding yeast and *Drosophila*. PARN was first reported to regulate the poly(A) status of maternal mRNA in *Xenopus* oocytes (Korner et al. 1998). Then, PARN has been shown to function in the poly(A) removal of various RNAs (Goldstrohm and Wickens 2008, Weill et al. 2012, Norbury 2013). More recent studies showed that animal PARN has a pivotal role in the maturation of functional RNAs, such as small RNA, telomerase RNA component and ribosomal RNA (Berndt et al. 2012, Yoda et al. 2013, Moon et al. 2015, Stuart et al. 2015, Shukla et al. 2016, Tang et al. 2016, Ishikawa et al. 2017, Monteliese et al. 2017, Shukla et al. 2019).

RNA in organelle is no exception. In plants, several steps comprise the mitochondrial post-transcriptional regulations. Mitochondrial transcripts undergo 5' and 3' end processing, splicing, RNA editing and polyadenylation (Hammani and Giegé 2014). Polyadenylation of mitochondrial mRNA has been reported in various eukaryotes. However, its physiological role can be different among eukaryotes and is still controversial (Gagliardi et al. 2004).

In human, polyadenylation was shown to stabilize some mitochondrial mRNAs but destabilize other mitochondrial mRNAs (Tomecki et al. 2004, Nagaike et al. 2008, Nagao et al. 2008) and described to be required for translation (Rorbach et al. 2011). In plant mitochondria, polyadenylation occurs at 3' termini and average tail length was 22 nucleotides in maize (Lupold et al. 1999). Polyadenylation of plant mitochondrial mRNA is believed to induce the degradation of RNA as in bacteria, implying that the physiological role of polyadenylation in mitochondria has been conserved from the symbiotic alpha proteobacteria (Lange et al. 2009). Along with this idea, it has been thought that polyadenylation of plant mitochondrial mRNA is regulated by polynucleotide phosphorylase (PNPase). PNPase is a bifunctional enzyme possessing 3'–5' phosphorolytic exoribonuclease activity and 3'-terminal oligonucleotide polymerase activity. In *Escherichia coli*, PNPase is responsible for the polyadenylation of mRNA (Mohanty and Kushner 2011). Actually, reduced expression of a mitochondria-localized PNPase in Arabidopsis caused an accumulation of unprocessed polyadenylated *atp9* transcripts (Perrin et al. 2004).

Arabidopsis has a gene encoding PARN that is essential for embryogenesis and growth (Chiba et al. 2004, Reverdatto et al. 2004). We have been studying the function of this gene because its partially defective mutation, *ABA hypersensitive germination2-1* (*ahg2-1*), causes enhanced responses to abscisic acid and salicylic acid, plant hormones involved in environmental stress responses (Nishimura et al. 2005, Nishimura et al. 2009). We have reported previously that AHG2/AtPARN is localized to mitochondria and is involved in the regulation of poly(A) status of mitochondrial mRNA, counter-interacting with a bacterial type poly(A) polymerase (PAP), AGS1, which was identified as the *ahg2-1* suppressor mutant gene (Hirayama et al. 2013). Such the poly(A) regulation of mitochondrial mRNA has not been reported in animals or yeasts. This unique utilization of PARN and the regulation of the mitochondrial mRNA poly(A) status of Arabidopsis might reflect the distinct characteristics of plant cells, which possess two different symbiotic organelles. However, it is not confirmed yet whether this AHG2–AGS1 system is conserved among plants or not, even though AHG2/PARN homologs are predicted to be localized to mitochondria in various plant species (Hirayama 2014). To address this issue, we studied AHG2 and AGS1 counterparts in a liverwort, *Marchantia polymorpha*, a member of a basal land plant lineage (Bowman et al. 2007, Bowman et al. 2017). We demonstrated that both the *M. polymorpha* counterparts of AHG2 and AGS1 are localized to mitochondria and functionally interact with each other and that the poly(A) status and the levels of mitochondrial mRNA were affected by the genetic modulation of MpAHG2 and MpAGS1. Our data suggest that the AHG2 and AGS1 system where a PARN and a PAP regulate the poly(A) status of mitochondrial mRNA is conserved among land plants.

## Results

### Identification of Arabidopsis AHG2 and AGS1 orthologs in the *M. polymorpha* genome

To identify the *M. polymorpha* orthologs of Arabidopsis AHG2 and AGS1, transcripts with a potential to encode proteins similar to

these Arabidopsis proteins were searched against *M. polymorpha* EST and full-length cDNA databases along with the genome sequence data. We successfully identified the candidates with higher similarities in amino acid sequences to Arabidopsis AHG2 and AGS1 (hereafter mentioned as AtAHG2 and AtAGS1, respectively). According to the genome sequence data (*M. polymorpha* JGI version 3.1; Bowman et al. 2017), *M. polymorpha* has one ortholog each for AtAHG2 and AtAGS1 (Supplementary Figs. S1, S2). We then named these orthologs MpAHG2 (gene ID: Mapoly0076s0056.1) and MpAGS1 (gene ID: Mapoly0136s0037.1 and Mapoly0171s0002.1) according to the nomenclature (Bowman et al. 2016) and focused on them in this study.

A phylogenetic analysis showed that Arabidopsis and several other plants have additional AHG2/PARN homologs, although these amino acid sequences are less conserved and constitute an additional clade (Supplementary Fig. S1). Among animal PARNs, R3H and RNA recognition (RRM) motifs are highly conserved (Wu et al. 2009). These motifs are not found in MpAHG2 and other plant PARN homologs (Supplementary Fig. S2A), but the amino acid sequences of the corresponding positions for these motifs are highly conserved among plant PARNs, implying that these portions are required for the function of plant PARNs. Bacterial type PAP shares the amino acid sequence with CCA-adding enzyme, which adds triplet C-C-A residues to the 3' end of tRNA creating the amino acid accepting structure. Both enzymes belong to terminal nucleotidyltransferase, but these can be distinguished by the presence or absence of the PAP-specific motifs (Martin and Keller 2004). According to this classification, MpAGS1 belongs to the PAP family (Supplementary Fig. S2B). Consistently, a phylogenetic analysis also showed that Arabidopsis At1g22660, which was previously shown to be a CCA-adding enzyme (Zimmer et al. 2009), is distant from MpAGS1 and AtAGS1 (Supplementary Fig. 2B).

### MpAHG2– and MpAGS1–Citrine fusion proteins are localized to mitochondria in *M. polymorpha* cells

To determine the subcellular localizations of MpAHG2 and MpAGS1, open reading frames of MpAHG2 and MpAGS1 cDNA clones were translationally fused with a Citrine gene and placed under the constitutive 35S promoter. These recombinant genes were introduced into *M. polymorpha* cells, and several stable transgenic lines were established. Under a laser-scanning microscope, wild-type cells showed very weak fluorescence of chloroplasts, which most probably depends on autofluorescence, while Citrine fluorescence was detected clearly in both the MpAHG2–Citrine and MpAGS1–Citrine transgenic lines (Fig. 1). In both lines, the Citrine fluorescence was detected as spots dispersed in the cell. When the tissues were stained with MitoTracker, the Citrine signals were almost completely overlapped with MitoTracker signals, suggesting that MpAHG2 and MpAGS1 are localized to the mitochondria of *M. polymorpha*.

### Attempts to obtain the loss-of-function mutants of MpAHG2

To understand the physiological roles of MpAHG2, we made an attempt to obtain MpAHG2 disruption mutants using the

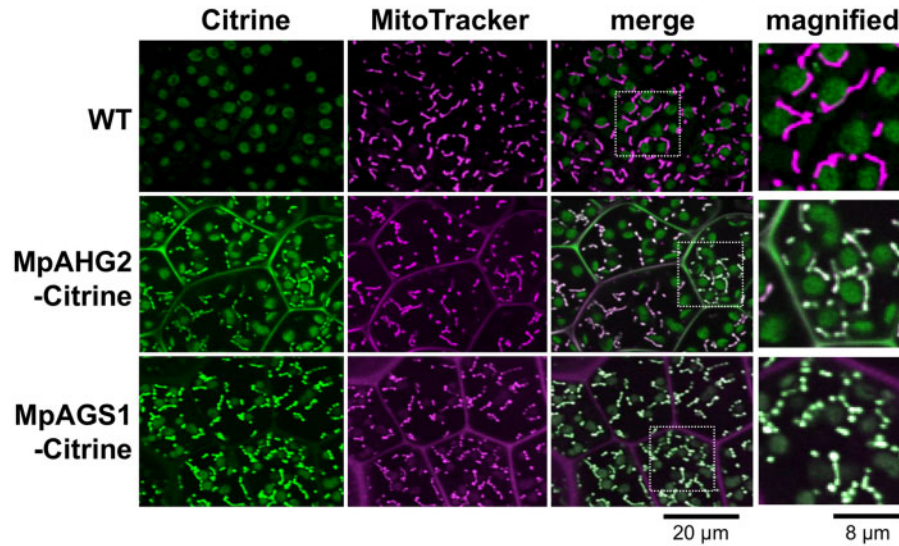

**Fig. 1** Subcellular localization of Citrine fused MpAHG2 or MpAGS1 protein in *M. polymorpha* cell. Transgenic *M. polymorpha* plants expressing constitutively MpAHG2-Citrine or MpAGS1-Citrine were constructed. Part of thallus of transgenic lines and wild type (WT, Tak-1) was excised and stained with MitoTracker and observed under laser-scanning microscope. The ‘magnified’ panels show the enlarged images of the squared regions of the ‘merged’ images.

homologous recombination mutagenesis. However, no such the mutants were obtained after analyzing >500 antibiotic resistant lines, while the general efficiency of mutant isolation by homologous recombination is about 2% in *M. polymorpha* (Ishizaki et al. 2013). This result suggests that MpAHG2 is essential for survival in *M. polymorpha*, similar to AtAHG2 in Arabidopsis. Therefore, we used the CRISPR/Cas9 mutagenesis expecting to introduce more moderate mutations, such as an amino acid substitution. We chose the following five target sequences: two for exons and three for exon–intron junctions (Fig. 2A). Using these targets, consequently, three independent mutants (Mpahg2-1, Mpahg2-2 and Mpahg2-3) were obtained and were edited near the junction of the second intron and the third exon. In these mutant lines, several nucleotides at six or seven bases upstream of the intron–exon junction were deleted (Fig. 2B). Interestingly, these three mutant candidates showed a retarded growth with different extent; Mpahg2-1 showed the strongest phenotypes and Mpahg2-3 showed the weakest phenotypes (Fig. 2C and Supplementary Fig. S3). The transcript levels of MpAHG2 in these lines were decreased to some extent (Fig. 2D) and seemed to correlate with the retarded growth phenotypes (Fig. 2C, D). The nucleotide sequence of MpAHG2 cDNA obtained from these mutants was identical to the ‘CUFF’ transcript data in MarpolBase database (<http://marchantia.info>) indicating that the intron was removed normally. These results imply that the few base deletion near the junction of second intron and third exon reduced the expression of MpAHG2, which caused the growth retardation phenotype, and further suggest that MpAHG2 is indispensable for the growth of *M. polymorpha*.

### Isolation of the loss-of-function mutants of MpAGS1

To address the physiological roles of MpAGS1, we also made the loss-of-function mutants of this gene. The CRISPR/Cas9

constructs that harbored a guide RNA targeting MpAGS1 exon 5 (target1 or target2) were introduced into *M. polymorpha* cells and, transgenic lines were obtained (Fig. 3A). Among them, we successfully obtained two independent mutants, Mpags1-1 or Mpags1-2, which had 1 bp insertion or 7 bp deletion causing a frameshift and premature translation termination of MpAGS1, respectively (Fig. 3B). Both of the mutants exhibited weak growth retardation phenotypes under normal growth conditions (Fig. 3C). The fresh weights of the thallus of the Mpags1 mutants were about 65% of that of wild type (Fig. 3D). These data indicate that MpAGS1 is dispensable but required for normal growth of *M. polymorpha*.

### Isolation of Mpahg2Mpags1 double mutants

In Arabidopsis, loss-of-function mutations of the AtAGS1 gene suppressed the lethality of the AtAHG2 disruption mutant (Hirayama et al. 2013). If there is a similar genetic interaction between MpAHG2 and MpAGS1, loss-of-function mutations of MpAHG2 can be obtained in the Mpags1-defective mutation background. The CRISPR/Cas9 constructs with the target sequence for the first exon (target1) or the last exon (target2) of MpAHG2 (Fig. 2A), with which we had failed to obtain mutants in the wild-type background as described above, were introduced into the Mpags1-1 and Mpags1-2 lines. Intriguingly, with this approach, several loss-of-function mutations of MpAHG2 were successfully obtained. Among them, we chose three lines, Mpags1-1Mpahg2-4, Mpags1-1Mpahg2-5 and Mpags1-2Mpahg2-6 (Fig. 4A and Supplementary Fig. S4). All of the identified mutations had insertions in the exon causing a frameshift and premature translation termination of MpAHG2. Their growth rates were lower compared with that of wild type but were similar to those of Mpags1-1 or Mpags1-2 (Fig. 4B, C). These observations suggest that the lethality of loss-of-function mutation of Mpahg2 is suppressed by the mutations of



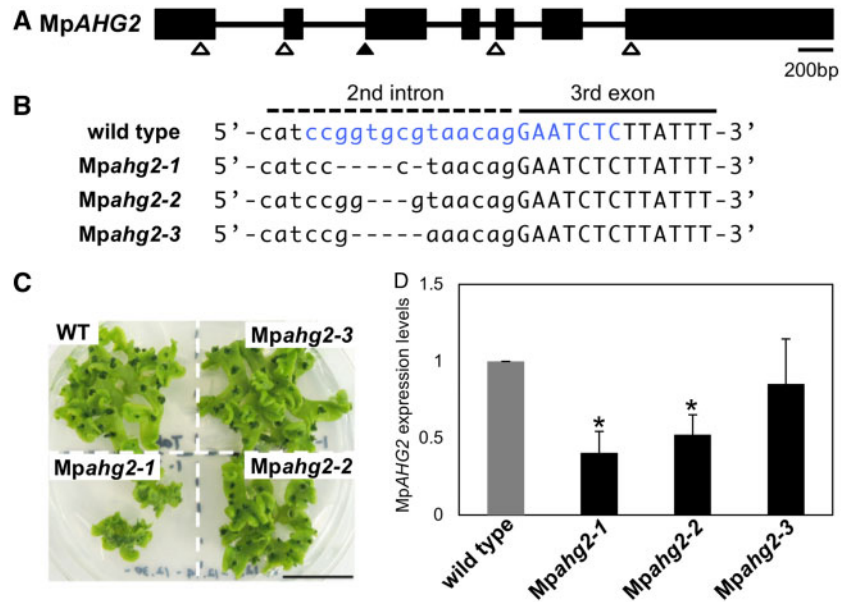

**Fig. 2** Weak Mpahg2 mutants produced with the CRISPR/Cas9 genome editing methodology. (A) Schematic representation of the MpAHG2 gene. Filled boxes and lines indicate exons and introns, respectively. Open triangles indicate the position of the target sites of CRISPR/Cas9 sgRNAs, filled triangle indicates the target sites described in (B). (B) Nucleotide sequences of the target (gRNA sequence in blue) and the edited sites. (C) Morphologies of the Mpahg2 mutants and wild type (WT; Tak-1) grown on the plate for 38 d. Scale bar indicates 20 mm. (D) Relative expression levels of MpAHG2. The expression levels were normalized with MpEF1 $\alpha$  and expressed as relative levels to that of WT (Tak-1). Error bars indicate SD ( $n = 3$ ). \*Significant difference between wild type ( $P < 0.05$ , Student's  $t$ -test).

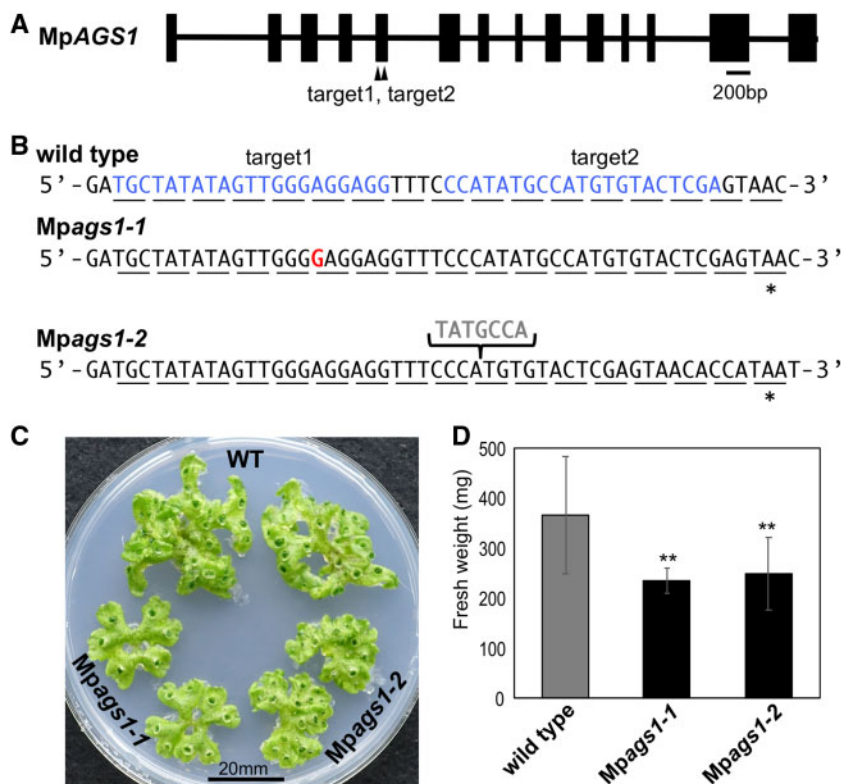

**Fig. 3** Phenotype of the Mpags1 defective mutants. (A) Schematic representation of the MpAGS1 genes. Black boxes and lines indicate exons and introns, respectively. The approximate positions of the targets of CRISPR/Cas9 sgRNAs are shown. (B) Nucleotide sequences around the target sites (gRNA sequence in blue) of wild type (WT; Tak-1) and the obtained mutants, Mpags1-1 (1 bp insertion) and Mpags1-2 (7 bp deletion). (C) Morphologies of the Mpags1 mutants and WT (Tak-1) grown on the plate for 40 d. Scale bar indicates 20 mm. (D) Fresh weight of the thallus of the Mpags1 mutants and WT (Tak-1) grown on the plate for 30 d. Error bars indicate SD ( $n \geq 13$ ). \*\*Significant difference between WT ( $P < 0.01$ , Student's  $t$ -test).

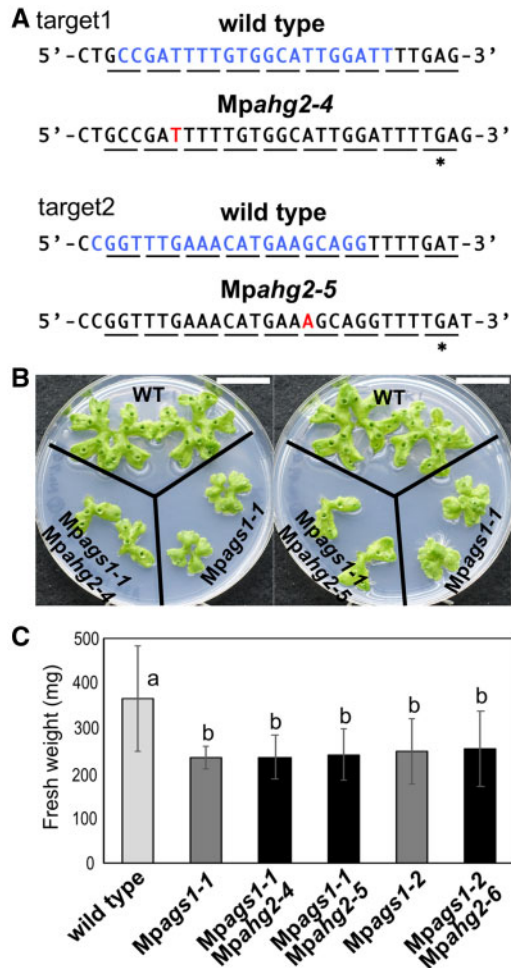

**Fig. 4.** Loss-of-function mutations of MpAHG2 in the Mpags1 mutant background. (A) Nucleotide sequence around the target sites (gRNA sequence in blue) of wild type (WT; Tak-1) and the obtained mutants, Mpahg2-4 and Mpahg2-5 (inserted nucleotides in red). (B) Morphologies of the thallus of WT (Tak-1), Mpags1-1 and Mpags1Mpahg2 double mutants grown on the plate for 35 d. Bar indicates 20 mm. (C) Fresh weight of the thallus grown on the plate for 30 d [mean  $\pm$  SD, one-way analysis of variance (ANOVA) followed by Tukey's test ( $P < 0.05$ ),  $n \geq 10$ ].

MpAGS1 and that Mpahg2 and Mpags1 have a genetic interaction.

### Biochemical properties of MpAHG2 and MpAGS1

To characterize MpAHG2 and MpAGS1 proteins, their in vitro biochemical activities were examined. For this purpose, recombinant proteins were produced and isolated (**Supplementary Fig. S5**). Using these recombinant proteins, in vitro activities were assayed. To examine the deadenylase activity of the recombinant MpAHG2, various substrate RNAs were prepared (**Fig. 5A**) and coincubated with the recombinant protein and, then, their lengths were analyzed with capillary electrophoresis (**Fig. 5B**). When poly(A)<sub>25</sub> and poly(A)<sub>18</sub> RNA, in which 25- and 18-nt poly(A) sequences were added to a 56-nt vector sequence, respectively, were incubated with the recombinant MpAHG2, the signals corresponding to the full-length RNAs

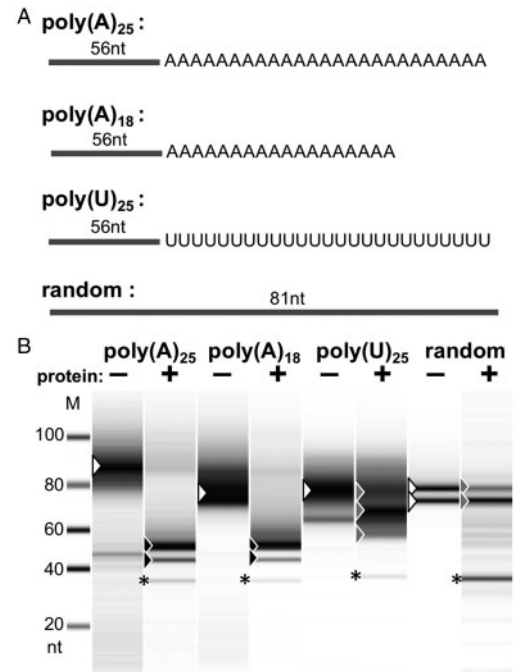

**Fig. 5** In vitro deadenylase assay of MpAHG2. (A) Structure of the RNA substrates. Gray bars indicate the sequence derived from a vector sequence. (B) Substrate RNAs were incubated with (+) or without (-) the recombinant MpAHG2 protein and analyzed by capillary electrophoresis. White triangles indicate substrate RNAs, and black and gray triangles indicate major RNAs in the incubated samples. Asterisks indicate an RNase independent signal detected in all the protein samples obtained through the in vitro transcription-translation system.

of poly(A)<sub>25</sub> and poly(A)<sub>18</sub> were disappeared but instead a signal corresponding to the vector sequence was appeared. When poly(U)<sub>25</sub> RNA was used, signals corresponding to the intact substrate RNA and various fragments with larger molecular weight than 56 nt were observed and a clear substrate shortening was not observed when the vector sequence RNA was used. These data suggest that the recombinant MpAHG2 alone has the ability to remove poly(A) sequence preferentially from RNA substrates in vitro, confirming that MpAHG2 belongs to the PARN.

Similarly, the PAP activity of the recombinant MpAGS1 was assessed using these RNA substrates. However, we were not able to detect the PAP activity, even though various experimental conditions, such as buffer pH or nucleotide tri-phosphate composition, were changed. Previously, under the same in vitro assay conditions, we could successfully detect the AtAGS1 activity (Hirayama et al. 2013). Therefore, it implied that the purified recombinant MpAGS1 protein alone does not have the PAP activity.

### Poly(A) status of mitochondrial mRNA in MpAGS1 overexpression and Mpahg2 mutant lines

To address the PAP activity of MpAGS1 in vivo, we produced transgenic *M. polymorpha* lines possessing a recombinant gene in which MpAGS1 cDNA was fused to 35S promoter. These lines showed a slightly retarded growth phenotype (**Supplementary**

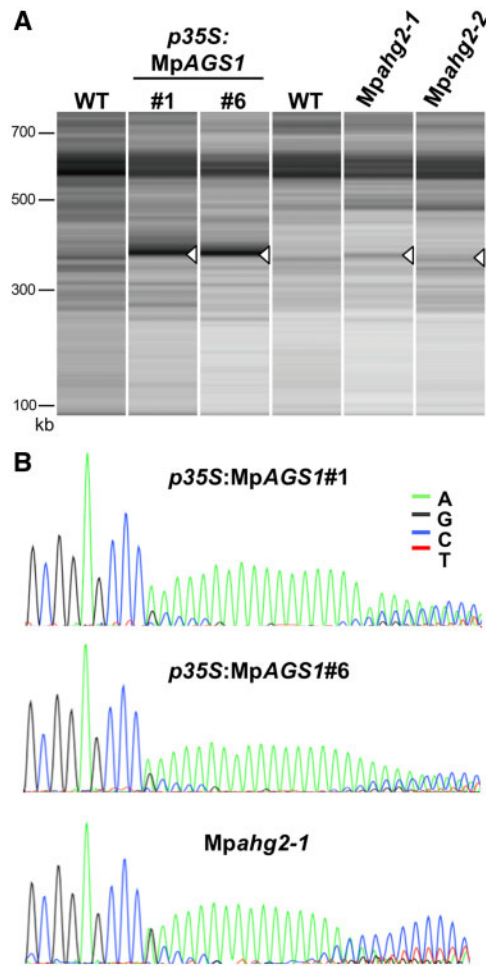

**Fig. 6** Effect of MpAGS1 overexpression and Mpahg2 mutations on the poly(A) status of mitochondrial mRNA. (A) Poly(A) tail-length assay for *Mpcox1* using RNA samples from wild type (Tak-1), MpAGS1 overexpression lines (#1, #6) and Mpahg2 mutants (Mpahg2-1, Mpahg2-2). Triangles indicate the DNA fragments specifically detected in the transgenic plants. (B) Nucleotide sequence of the indicated DNA fragment in (A).

**Fig. S6A**). The increased MpAGS1 transcript levels were confirmed by qRT-PCR experiments (**Supplementary Fig. S6B**). We examined that the poly(A) status of steady-state mitochondrial *Mpcox1* mRNA of these lines was analyzed with PAT assay amplifying the cDNA for the poly(A) tail attached at the 3' end of the target gene mRNA. Interestingly, an additional and more intense PAT product was detected in the MpAGS1 overexpression lines (**Fig. 6A**). Sequencing analysis of these DNA fragments revealed that these PAT products actually were derived from polyadenylated *Mpcox1* mRNA (**Fig. 6B**). These data strongly suggest that MpAGS1 is involved in poly(A) addition in the liverwort mitochondria. With the same experimental approach, poly(A) status of mitochondrial mRNA in the Mpahg2 mutant lines, severe mutant Mpahg2-1 and moderate mutant Mpahg2-2, were examined. As shown in **Fig. 6A**, the additional DNA fragments with almost the same molecular length observed in the MpAGS1 overexpression lines were detected. The signal intensity of this DNA fragment was stronger in the severe mutant Mpahg2-1 than in the moderate

mutant Mpahg2-2. The DNA fragment isolated from Mpahg2-1 sample also possessed a poly(A) sequence (**Fig. 6B**).

In our previous study with *Arabidopsis*, we demonstrated that the *Atahg2-1* mutation increases the mitochondrial mRNA levels (Hirayama et al. 2013). Then, we next examined how the defect of MpAGS1 or MpAHG2 or the overexpression of MpAGS1 affects the mitochondrial mRNA levels. As shown in **Fig. 7**, in the severe Mpahg2-1 mutant, the transcript levels of all of the mitochondrial gene examined were increased, more or less. The genetic modulation of MpAGS1 also affected the transcript levels of mitochondrial genes. The transcript levels of *Mpcob*, *Mpnad1* and *Mpatp9* were significantly increased in the *Mpags1-2*-defective mutant, while they were not affected consistently in the MpAGS1 overexpression lines (**Fig. 7**). In contrast, the transcript levels of *Mpcox1*, *Mpnad5* and *Mpatp8* were slightly increased in *Mpags1-2*, while they were apparently decreased in the MpAGS1 overexpression lines. These data imply that an enhanced MpAGS1 activity tends to decrease the mitochondrial transcript levels. Consistently, reduced activity of MpAGS1 in *Mpags1* tends to increase the mitochondrial mRNA levels.

The transcript levels of MpAGS1 and MpAHG2 were also examined. The MpAHG2 transcripts were slightly less accumulated in the MpAGS1 overexpression lines and *Mpags1-2*. On the other hand, the MpAGS1 transcripts were slightly increased in Mpahg2-1 (**Supplementary Fig. S6B**). These observations suggest that the activities of MpAGS1 and MpAHG2 affect the expression of MpAHG2 and MpAGS1, respectively, although its mechanism and physiological relevance are unknown. It is obvious that the affected expression of MpAGS1 in Mpahg2-1 or MpAHG2 in the MpAGS1 overexpression lines and *Mpags1-2* was not the cause of the altered expression of mitochondrial genes because there is no clear correlation.

### Complementation analysis of *Arabidopsis* mutant by *M. polymorpha* genes

All the data described above suggest that MpAHG2 and MpAGS1 function in *M. polymorpha* mitochondria as AtAHG2 and AtAGS1 do in *Arabidopsis* mitochondria, respectively. To confirm this idea, we asked if MpAHG2 or MpAGS1 behaves as AtAHG2 or AtAGS1 does in *Arabidopsis*, respectively. The recombinant MpAHG2 or MpAGS1 cDNA, in which the N-terminal portion predicted as a transit peptide for mitochondrial localization was replaced with the signal peptide of an *Arabidopsis* mitochondria-localized protein PNPase (At5g14580). When the recombinant MpAHG2 cDNA clone was introduced into the *Arabidopsis ahg2-1* mutant, the dwarf phenotype of *ahg2-1* was partially suppressed regarding the size of the rosette (**Fig. 8A** and **Supplementary Fig. S7A**). A PAT assay for *Arabidopsis* mitochondria *cox1* or *nad7* mRNAs revealed that the amounts of polyadenylated mRNA and total mRNA for these genes were significantly decreased in the *ahg2-1* transgenic plants expressing MpAHG2 (**Fig. 8B, C**), consistent with the morphological phenotype. The poly(A) status of *Arabidopsis* mitochondria *orf107* mRNA was examined by circularized RT-PCR (cRT-PCR) assay. In *Atahg2-1*, polyadenylated clones (additional A residues, more than two) were detected in



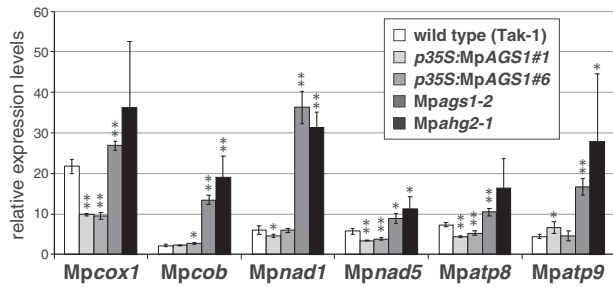

**Fig. 7** Effect of MpAGS1 overexpression, Mpags1 mutation and Mpahg2 mutation on the mitochondrial mRNA levels. The transcript levels of *Mpcox1*, *Mpcob*, *Mpnad1*, *Mpnad5*, *Mpatp8* and *Mpatp9* were examined by qRT-PCR using the cDNA mixture synthesized with total RNA obtained wild type (Tak-1), MpAGS1 overexpressing lines (# 1, # 6), *Mpags1* and *Mpahg2-1*. Transcript levels were normalized with a nuclear genome-coding gene for a mitochondrial ATP synthase subunit (ATP synthase gamma) and expressed as relative levels to that of wild type (Tak-1). Error bars indicate the SD ( $n = 3$ ). \*\*Significant differences between wild type ( $P < 0.05$  and  $0.01$ , respectively, Student's  $t$ -test).

18 of the 34 clones examined (Hirayama et al. 2013). In the MpAHG2 transgenic line # 1, only 5 of the 33 clones examined were polyadenylated (Supplementary Table S1). These data indicate that MpAHG2 has ability to compensate the defect of the *ahg2-1* mutation of Arabidopsis. Increased AGS1 activity in Arabidopsis would confer the *Atahg2-1*-like phenotype in planta, namely a dwarf phenotype, and accumulate polyadenylated *Atnad7* in cells (Hirayama et al. 2013). We obtained a few transgenic lines expressing recombinant MpAGS1 gene in the wild-type background. However, these transgenic lines did not show any visible phenotypes (Supplementary Fig. S7B). Consistently, we could detect only faint PAT fragments of *Atnad7* and *Atcox1* in MpAGS1-overexpressing lines (Fig. 8B).

## Discussion

In Arabidopsis, the stability of mitochondrial mRNA seems to be regulated through 3' end polyadenylation and deadenylation by AtAGS1/PAP and AtAHG2/PARN, respectively (Hirayama et al. 2013). In this study, we showed that a liverwort, *M. polymorpha*, which is a member of a basal land plant lineage, has a mitochondrial polyadenylation system similar to that of Arabidopsis. This conclusion is supported by our data showing that MpAGS1 and MpAHG2 encoded by the AtAGS1 and AtAHG2 orthologous genes, respectively (Supplementary Fig. S1) were localized to mitochondria of *M. polymorpha* (Fig. 1), that MpAHG2 had a deadenylase activity in vivo and in vitro (Figs. 5, 6, 8) and that MpAGS1 had a PAP activity in vivo (Fig. 6). And most importantly, the lethality of the MpAHG2 loss-of-function mutation was suppressed by the MpAGS1 loss-of-function mutation (Figs. 2, 4), suggesting that MpAHG2 and MpAGS1 regulate the same RNA substrates. We also demonstrated that the heterologous expression of MpAHG2 complemented, at least partly, *Atahg2-1* in Arabidopsis. It is plausible that the AGS1/PAP–AHG2/PARN regulatory system is conserved among land plants.

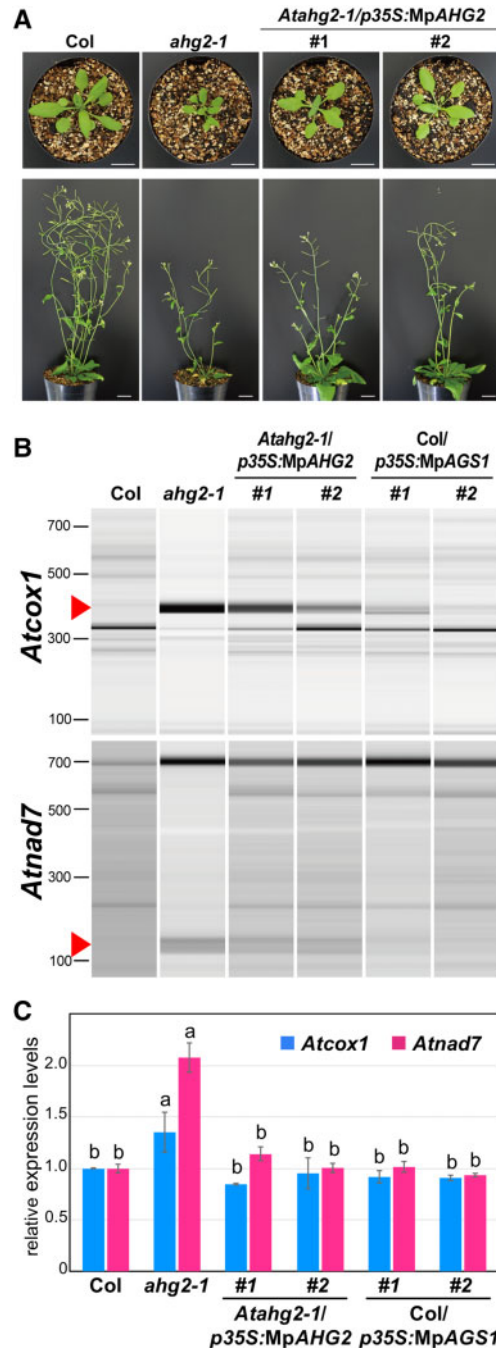

**Fig. 8** Complementation analysis of *Atahg2-1* by MpAHG2. (A) Morphologies of the wild-type (Col-0), *Atahg2-1* and *Atahg2-1* expressing MpAHG2 (# 1, # 2) plants. Upper panels show the top views of 2-week-old plants. Bottom panels show the side view of 5-week-old plants. Bars indicate 20 mm. (B) Poly(A) tail-length assay for *Atcox1* and *Atnad7* using RNA samples from wild-type (Col), *Atahg2-1* and *Atahg2-1*+35S:MpAHG2 transgenic plants and wild type+35S:MpAGS1 transgenic plants. Triangle indicates a PAT fragment. (C) The transcript levels of *Atcox1* and *Atnad7* were examined by qRT-PCR using the cDNA mixture synthesized with total RNA obtained from wild-type (Col), *Atahg2-1* and *Atahg2-1*+35S:MpAHG2 transgenic plants and wild type+35S:MpAGS1 transgenic plants. Transcript levels were normalized with *AtACT2* and expressed as relative levels to that of wild type [mean  $\pm$  SD, one-way ANOVA followed by Tukey's test ( $P < 0.05$ ),  $n = 3$ ].

However, there are several different properties between the Arabidopsis and *M. polymorpha* AHG2–AGS1 systems. First, although the Arabidopsis AtAGS1-defective mutants did not exhibit any clear visible phenotypes (Hirayama et al. 2013), the *Mpags1* mutants displayed weak growth retardation (Fig. 3). This finding implies that poly(A) addition of mitochondrial mRNA is physiologically more important in *M. polymorpha* than Arabidopsis. Alternatively, it is possible that MpAGS1 has additional roles. Second, the recombinant MpAGS1 proteins did not show polyadenylase activity at all in the experimental conditions where a recombinant AtAGS1 protein could. Considering the high similarity of amino acid sequence between MpAGS1 and AtAGS1, the molecular phenotype of mitochondrial mRNA in the MpAGS1-overexpressing *M. polymorpha* lines and the genetic interaction between the *Mpags1* and *Mpahg2* defective mutants, it is more plausible that MpAGS1 has a polyadenylase activity. We tried to detect the activity of a recombinant MpAGS1 protein by changing experimental conditions but failed. On the other hand, we could detect a strong deadenylase activity of the recombinant MpAHG2 protein, whereas we had not been able to detect the AtAHG2 activity in the same conditions. These observations had led us to an idea that AtAGS1 and MpAHG2 can exhibit their enzymatic activities alone, whereas MpAGS1 and AtAHG2 require other components or post-translational modifications for their activities. The absence of strong molecular phenotypes in the transgenic Arabidopsis-expressing MpAGS1 is consistent with this idea (Fig. 8B, C). Identification of the co-factors for MpAGS1 and AtAHG2 will lead us to the comprehension of uniqueness of plant mitochondria and plants.

PARN is distributed widely in eukaryotes and has been reported to be involved in the poly(A) removal of various RNAs (Goldstrohm and Wickens 2008, Weill et al. 2012, Norbury 2013). Recent studies of PARN in animals showed that PARN has a pivotal role in the maturation of non-protein coding functional RNA, such as small RNA, telomerase RNA component and ribosomal RNA (Berndt et al. 2012, Yoda et al. 2013, Moon et al. 2015, Stuart et al. 2015, Shukla et al. 2016, Tang et al. 2016, Ishikawa et al. 2017, Montellese et al. 2017, Shukla et al. 2019). In this study on *M. polymorpha* MpAHG2 and our previous study on Arabidopsis AtAHG2, we demonstrated these plant PARNs were predominantly localized to mitochondria. Although we cannot exclude the possibility that plant PARNs are involved in the RNA processing in the nucleus or cytoplasm as animal PARNs do, molecular phenotypes of Arabidopsis mutants, *M. polymorpha* mutants or transgenic lines are consistent with the mitochondrial function of these PARNs. In organisms lacking PARN, such as budding yeast and Drosophila, other factors are involved in the processing of functional RNA molecules in which animal PARNs are implicated. Plants might have similar alternative regulations.

Amino acid sequences of PARNs are highly conserved among vertebrates (Godwin et al. 2013). These animal PARNs have two conserved domains, such as R3H and RRM (Supplementary Fig. S1). These motifs are required for binding to the 5'-cap structure of mRNA (Nilsson et al. 2007, Wu et al. 2009). The cap-binding activity of PARN is thought to be

necessary for the regulation of poly(A) status of mRNA. Interestingly, plant PARNs are lacking these motifs. This distinct structure of plant PARN implies their different biochemical function. As we demonstrated with AtAHG2 and MpAHG2, plant PARNs are localized and function in mitochondria and cap-binding activity is not necessary for them since mitochondrial mRNA lacks the cap structure.

There have been arguments on the relationships among the processes of poly(A) addition, poly(A) removal and mRNA degradation. Presumably, a reduced expression of MpAHG2 and an increased expression of MpAGS1 would cause the same effect because either modulation results in the accumulation of polyadenylated mitochondrial mRNA. In this study, we showed that the *Mpahg2-1* mutation resulted in the accumulations of both polyadenylated and total mRNA of several mitochondrial genes (Figs. 6, 7), as observed in the Arabidopsis *ahg2-1* mutant (Hirayama et al. 2013). We also showed that the overexpression of MpAGS1 in *M. polymorpha* increased polyadenylated mRNAs. However, the transcript levels of mitochondrial genes were lower accumulated in the MpAGS1-overexpressing lines, while those were higher in the *Mpags1* mutant. This discrepancy can be explained by the presence or absence of MpAHG2. The polyadenylated mRNA in the MpAGS1-overexpressing lines would be the target of poly(A) removal by MpAHG2 and the subsequent RNA degradation. Thus, the increased ratio of polyadenylated mRNA would induce the degradation of mRNA and result in the decrease in the total mRNA levels in the presence of AHG2/PARN. Our observations in this study and the previous study support the idea that the removal of poly(A) of plant mitochondrial mRNA induces the degradation of mRNA.

Plant and animal mitochondria have been thought to share many characteristics. However, detailed analyses have revealed that they are quite different from each other. Animal mitochondrial genome is about 15–20 kb in length and containing <37 genes (including tRNA genes; Boore 1999). In human mitochondria, each strand of mitochondrial DNA is transcribed as a single transcript and then processed to several mRNAs (Mercer et al. 2011). In contrast, mitochondrial genomes of *M. polymorpha* and Arabidopsis are about 186 and 370 kb in length, respectively and both genomes contain about 60 genes (Oda et al. 1992, Unseld et al. 1997). Most of their protein-coding genes seem to be transcribed separately. Such differences in gene number and transcript structures might require distinct regulatory mechanisms. One possible explanation for this plant uniqueness is that plant cells have another symbiotic organelle, plastid. It can be postulated that, in the evolutionary process, plants needed a specific gene regulatory system for each symbiotic organelle. During such a process, PARN might have been appointed to the mitochondrial specific mRNA regulator. Interestingly, algae do not seem to possess this AGS1–AHG2 system. Chlamydomonas does not have PARN (Zimmer et al. 2008). Recent study showed that mitochondrial mRNA is polycytidylated in Chlamydomonas (Salinas-Giegé et al. 2017), indicating that this alga has different strategies to regulate mitochondrial mRNA. It might be possible that the AGS1–AHG2 system was required to adapt to the terrestrial environment when plants landed during the evolution. This idea is



consistent with the fact that *Atahg2-1* has environmental stress-related phenotypes (Nishimura et al. 2005, Nishimura et al. 2009, Hirayama et al. 2018). Further analysis on the plant-specific mitochondrial regulation will offer us clues to understand the unique and elaborated system of plants to cope with environment stresses.

## Materials and Methods

### *M. polymorpha* growth conditions

*Marchantia polymorpha* Takaragaike-1 (Tak-1, male accession) and Takaragaike-2 (Tak-2, female accession) were used as wild-type plants (Ishizaki et al. 2008). *Marchantia polymorpha* was cultured asexually under continuous white light at 22°C. F1 spores generated by crossing Tak-2 and Tak-1 were used for transformation. Mature sporangia were collected 3–4 weeks after crossing, air-dried for 7–10 d and stored at –80°C until use.

### Phylogenetic analysis

Protein or transcript sequences were obtained by the BLAST search against Arabidopsis AHG2 and AGS1 in JGI Phytozome V12.2 (<https://phytozome.jgi.doe.gov/pz/portal.html>) for Viridiplantae lineage and in the GenBank databases at NCBI for *Homo sapiens* and *Xenopus laevis*. Multiple sequence alignments were performed using the MUSCLE program (Edgar 2004) contained in the Geneious ver.11.1.3 package with the default settings, and at least 20% alignment gaps were automatically removed by using the mask alignment function in the Geneious package. After removing alignment gaps, trees were constructed using the fast maximum likelihood tree estimation program PhyML using the LG amino acids replacement matrix (Guindon and Gascuel 2003). Bootstrap proportions were computed from 1000 trials.

### Constructing transgenic *M. polymorpha*

cDNAs of MpAHG2 or MpAGS1 were amplified by PCR using cDNA mixture prepared from wild-type (Tak-1) total RNA with gene-specific primers (Supplementary Table S2). These cDNAs were cloned in pDONR207, and the nucleotide sequence was confirmed. For constructing transgenic *M. polymorpha*-expressing MpAHG2 or MpAGS1, cDNA clones were inserted into pMpGWB202 under the cauliflower mosaic virus-derived constitutive 35S promoter (Ishizaki et al. 2015). For constructing transgenic *M. polymorpha*-expressing MpAHG2- or MpAGS1-Citrine fusion protein, MpAHG2 or MpAGS1 cDNA without terminal codon was inserted into pMpGWB106 under 35S promoter (Ishizaki et al. 2015). These recombinant plasmids were transferred to F1 sporophytes or mutant thallus using *Agrobacterium tumefaciens* GV3101 strain with the method previously described (Ishizaki et al. 2008, Kubota et al. 2013). Transformants were selected on half-strength B5 agar medium containing 1% agar, appropriate antibiotics (10 mg/l of hygromycin, 100 mg/l of gentamicin and 0.5 µM chlorsulfuron) and 100 mg/l of cefotaxime (Claforan; Sanofi-Aventis).

### Mutant construction

All the *M. polymorpha* mutants in this study were obtained by CRISPR/Cas9 system optimized for *M. polymorpha* by Sugano et al. (2014) and Sugano et al. (2018). Double-stranded oligo DNAs corresponding to each single-guide RNA (sgRNA) target regions (Supplementary Table S2) were inserted into the *BsaI* site in the downstream of U6 promoter of pMpGE\_En03 vector according to the procedure described previously (Ikeda et al. 2018). Resultant plasmids were recombined with pMpGE010 or pMpGE011 binary vector and used for transformation with *Agrobacterium*.

### Constructing transgenic Arabidopsis-expressing MpAHG2 and MpAGS1

To express MpAHG2 or MpAGS1 in Arabidopsis, recombinant MpAHG2 and MpAGS1 genes in which their putative mitochondrial target signal sequences were replaced with that of an Arabidopsis mitochondria-localized protein gene (At5g14580) were constructed. These recombinant genes were placed under

35S promoter of a binary vector and used to transform Arabidopsis via *Agrobacterium* with the floral dip methods (Clough and Bent 1998).

### Quantitative real-time PCR experiments

For *M. polymorpha* samples, total RNA was isolated from plants grown from gemmae for 30–40 d on half-strength B5 medium containing 1% sucrose and 1% agar with RNazol (Molecular Research Center, Inc.) according to the manufacturer's instruction. For Arabidopsis samples, total RNA was isolated from 2-week-old plants using the Qiagen RNeasy Plant Mini Kit (Qiagen). One microgram of total RNA was treated with RNase-free DNase (Promega) and then used for cDNA synthesis using the PrimeScript II 1st strand cDNA Synthesis Kit with random primers (Takara Bio Inc.). Quantitative real-time PCR was performed on a LightCycler 96 System (Roche Diagnostics) in a total volume of 20 µl containing 10 µl of TB Green Primer Ex Taq II (Takara Bio Inc.), 8 pmol of each primer and a cDNA mixture described above using gene-specific primers (Supplementary Table S2). The amplification program consisted of 40 cycles of 95°C for 10 s and 60°C for 1 min. To calculate the relative amount transcripts, the comparative Ct method was used.

### PAT assay and cRT-PCR

Total RNA was isolated from 2-week-old Arabidopsis plants using the Qiagen RNeasy Plant Mini Kit (Qiagen) and used for cDNA synthesis with a dT(15)<sup>+</sup>-T7 promoter sequence primer. PAT assays were performed using a cDNA mixture with the T7 primer and a gene-specific primer for the sequence near the 3'-end of mRNA (Supplementary Table S2). The reaction mixture was analyzed with an Agilent 2100 Bioanalyzer. The procedures for cRT-PCR were derived from Couttet et al. (1997). Arabidopsis *orf107f* gene-specific cRTR1 primers were used for cDNA synthesis after RNA circularization, and gene-specific cRTF and cRTR2 primers were used for PCR (Supplementary Table S2).

### In vitro assay

Recombinant proteins were produced using the TNT SP6 high-yield wheat germ protein expression system (Promega) with Halo-tag-fused genes harbored by pFN19K vector, and Halo-tagged recombinant proteins were purified using the Halo-tag-binding resin. After the digestion with a sequence-specific protease, recombinant protein without Halo-tag moiety was purified. To detect the recombinant protein with Western blotting, purified proteins were separated on an SDS-PAGE gel and then transferred to a polyvinylidene fluoride membrane and exposed to anti-MYC-epitope-tag antibody (1:2000; Nakalai Tesque). The primary antibody was detected with a peroxidase-labeled anti-mouse-antibody (1:1000; GE Healthcare). Substrate RNA was synthesized using pGEM4z vector as described by Reverdatto et al. (2004) (Supplementary Table S2). Substrate RNA (0.4 µg) and recombinant proteins (~20 ng) were mixed and incubated in a buffer (10 mM HEPES, pH 7.2, 50 mM KCl, 5 mM MgCl<sub>2</sub>, 1 mM dithiothreitol, 0.25 mM each ribonucleotide, total volume 10 µl) at 23°C for 1 h. A portion (1 µl) of the reaction mixture was analyzed using an Agilent Small RNA kit (Agilent Technologies) with an Agilent 2100 Bioanalyzer.

### Microscopic observation

To visualize mitochondria, plant materials were stained with 150 nM MitoTracker Red CMXRos (Life Technologies Corporation) for 30 min at room temperature and washed with water for 30 min. Fluorescence of Citrine or MitoTracker was observed under a confocal microscope (FV1000-D; Olympus). Staining and observation conditions were based on Minamino et al. (2018).

## Supplementary Data

Supplementary data are available at PCP online.

## Funding

Grant-in-Aid for Scientific Research from the Ministry of Education, Culture, Sports, Science and Technology of Japan (MEXT) [15H04383 and 19K22434] to T.H.

## Acknowledgments

We thank Dr. Ryo Matsushima for his supporting in the experiments using the laser microscope, TH laboratory members for their technical supports and Dr. Takehiko Kanazawa and Dr. Takashi Ueda for sharing their methods to stain *M. polymorpha* mitochondria with MitoTracker. N.H.L. is grateful to the mobility programs running between Sorbonne and Okayama universities.

## Disclosures

The authors disclose any financial interests or connections, direct or indirect, or other situations that might raise the question of bias in the work reported or the conclusions, implications, or opinions stated—including pertinent commercial or other sources of funding for the individual author(s) or for the associated department(s) or organization(s), personal relationships or direct academic competition.

## References

- Berndt, H., Harnisch, C., Rammelt, C., Stöhr, N., Zirkel, A., Dohm, J.C., et al. (2012) Maturation of mammalian H/ACA box snoRNAs: PAPD5-dependent adenylation and PARN-dependent trimming. *RNA* 18: 958–972.
- Boore, J.L. (1999) Animal mitochondrial genomes. *Nucleic Acids Res.* 27: 1767–1780.
- Bowman, J.L., Araki, T., Arteaga-Vazquez, M.A., Berger, F., Dolan, L., Haseloff, J., et al. (2016) The naming of names: guidelines for gene nomenclature in *Marchantia*. *Plant Cell Physiol.* 57: 257–261.
- Bowman, J.L., Floyd, S.K. and Sakakibara, K. (2007) Green genes—comparative genomics of the green branch of life. *Cell* 129: 229–234.
- Bowman, J.L., Kohchi, T., Yamato, K.T., Jenkins, J., Shu, S., Ishizaki, K., et al. (2017) Insights into land plant evolution garnered from the *Marchantia polymorpha* genome. *Cell* 171: 287–304.e15.
- Chen, C.-Y.A. and Shyu, A.-B. (2011) Mechanisms of deadenylation-dependent decay. *Wiley Interdiscip. Rev. RNA* 2: 167–183.
- Chiba, Y., Johnson, M.A., Lidder, P., Vogel, J.T., van, Erp, H., and Green, P.J. (2004) AtPARN is an essential poly(A) ribonuclease in Arabidopsis. *Gene* 328: 95–102.
- Clough, S.J. and Bent, A.F. (1998) Floral dip: a simplified method for Agrobacterium-mediated transformation of *Arabidopsis thaliana*. *Plant J.* 16: 735–743.
- Couttet, P., Fromont-Racine, M., Steel, D., Pictet, R. and Grange, T. (1997) Messenger RNA deadenylation precedes decapping in mammalian cells. *Proc. Natl. Acad. Sci. USA* 94: 5628–5633.
- Edgar, R.C. (2004) MUSCLE: multiple sequence alignment with high accuracy and high throughput. *Nucleic Acids Res.* 32: 1792–1797.
- Filipowicz, W., Bhattacharyya, S.N. and Sonenberg, N. (2008) Mechanisms of post-transcriptional regulation by microRNAs: are the answers in sight? *Nat. Rev. Genet.* 9: 102–114.
- Gagliardi, D., Stepien, P.P., Temperley, R.J., Lightowlers, R.N. and Chrzanowska-Lightowlers, Z.M.A. (2004) Messenger RNA stability in mitochondria: different means to an end. *Trends Genet.* 20: 260–267.
- Godwin, A.R., Kojima, S., Green, C.B. and Wilusz, J. (2013) Kiss your tail goodbye: the role of PARN, nocturnin, and angel deadenylases in mRNA biology. *Biochim. Biophys. Acta Gene Regul. Mech.* 1829: 571–579.
- Goldstrohm, A.C. and Wickens, M. (2008) Multifunctional deadenylase complexes diversify mRNA control. *Nat. Rev. Mol. Cell Biol.* 9: 337–344.
- Guindon, S. and Gascuel, O. (2003) A simple, fast, and accurate algorithm to estimate large phylogenies by maximum likelihood. *Syst. Biol.* 52: 696–704.
- Hammani, K. and Giegé, P. (2014) RNA metabolism in plant mitochondria. *Trends Plant Sci.* 19: 380–389.
- Hirayama, T. (2014) A unique system for regulating mitochondrial mRNA poly(A) status and stability in plants. *Plant Signal. Behav.* 9: e973809.
- Hirayama, T., Lei, G.J., Yamaji, N., Nakagawa, N. and Ma, J.F. (2018) The putative peptide gene FEP1 regulates iron deficiency response in Arabidopsis. *Plant Cell Physiol.* 59: 1739–1752.
- Hirayama, T., Matsuura, T., Ushiyama, S., Narusaka, M., Kurihara, Y., Yasuda, M., et al. (2013) A poly(A)-specific ribonuclease directly regulates the poly(A) status of mitochondrial mRNA in Arabidopsis. *Nat. Commun.* 4: 2247.
- Houseley, J., LaCava, J. and Tollervey, D. (2006) RNA-quality control by the exosome. *Nat. Rev. Mol. Cell Biol.* 7: 529–539.
- Ikeda, Y., Nishihama, R., Yamaoka, S., Arteaga-Vazquez, M.A., Aguilar-Cruz, A., Grimanelli, D., et al. (2018) Loss of CG methylation in *Marchantia polymorpha* causes disorganization of cell division and reveals unique DNA methylation regulatory mechanisms of non-CG methylation. *Plant Cell Physiol.* 59: 2421–2431.
- Ishikawa, H., Yoshikawa, H., Izumikawa, K., Miura, Y., Taoka, M., Nobe, Y., et al. (2017) Poly(A)-specific ribonuclease regulates the processing of small-subunit rRNAs in human cells. *Nucleic Acids Res.* 45: 3437–3447.
- Ishizaki, K., Chiyoda, S., Yamato, K.T. and Kohchi, T. (2008) Agrobacterium-mediated transformation of the haploid liverwort *Marchantia polymorpha* L., an emerging model for plant biology. *Plant Cell Physiol.* 49: 1084–1091.
- Ishizaki, K., Johzuka-Hisatomi, Y., Ishida, S., Iida, S. and Kohchi, T. (2013) Homologous recombination-mediated gene targeting in the liverwort *Marchantia polymorpha*. *Sci. Rep.* 3: 1532.
- Ishizaki, K., Nishihama, R., Ueda, M., Inoue, K., Ishida, S., Nishimura, Y., et al. (2015) Development of gateway binary vector series with four different selection markers for the liverwort *Marchantia polymorpha*. *PLoS One* 10: e0138876.
- Isken, O. and Maquat, L.E. (2007) Quality control of eukaryotic mRNA: safeguarding cells from abnormal mRNA function. *Genes Dev.* 21: 1833–1856.
- Korner, C.G., Wormington, M., Muckenthaler, M., Schneider, S., Dehlin, E. and Wahle, E. (1998) The deadenylating nuclease (DAN) is involved in poly(A) tail removal during the meiotic maturation of *Xenopus* oocytes. *EMBO J.* 17: 5427–5437.
- Kubota, A., Ishizaki, K., Hosaka, M. and Kohchi, T. (2013) Efficient Agrobacterium-mediated transformation of the liverwort *Marchantia polymorpha* using regenerating thalli. *Biosci. Biotechnol. Biochem.* 77: 167–172.
- Lange, H., Sement, F.M., Canaday, J. and Gagliardi, D. (2009) Polyadenylation-assisted RNA degradation processes in plants. *Trends Plant Sci.* 14: 497–504.
- Lupold, D.S., Caoile, A.G. and Stern, D.B. (1999) Polyadenylation occurs at multiple sites in maize mitochondrial *cox2* mRNA and is independent of editing status. *Plant Cell* 11: 1565–1578.
- Martin, G. and Keller, W. (2004) Sequence motifs that distinguish ATP (CTP):tRNA nucleotidyl transferases from eubacterial poly(A) polymerases. *RNA* 10: 899–906.
- Mercer, T.R., Neph, S., Dinger, M.E., Crawford, J., Smith, M.A., Shearwood, A.-M.J., et al. (2011) The human mitochondrial transcriptome. *Cell* 146: 645–658.
- Minamino, N., Kanazawa, T., Era, A., Ebine, K., Nakano, A. and Ueda, T. (2018) RAB GTPases in the basal land plant *Marchantia polymorpha*. *Plant Cell Physiol.* 59: 845–856.
- Mohanty, B.K. and Kushner, S.R. (2011) Bacterial/archaeal/organellar polyadenylation. *Wiley Interdiscip. Rev. RNA* 2: 256–276.
- Montellese, C., Montel-Lehry, N., Henras, A.K., Kutay, U., Gleizes, P.-E. and O'Donohue, M.-F. (2017) Poly(A)-specific ribonuclease is a nuclear

- ribosome biogenesis factor involved in human 18S rRNA maturation. *Nucleic Acids Res.* 45: 6822–6836.
- Moon, D.H., Segal, M., Boyraz, B., Guinan, E., Hofmann, I., Cahan, P., et al. (2015) Poly(A)-specific ribonuclease (PARN) mediates 3'-end maturation of the telomerase RNA component. *Nat. Genet.* 47: 1482–1488.
- Nagaike, T., Suzuki, T. and Ueda, T. (2008) Polyadenylation in mammalian mitochondria: insights from recent studies. *Biochim. Biophys. Acta Gene Regul. Mech.* 1779: 266–269.
- Nagao, A., Hino-Shigi, N. and Suzuki, T. (2008) Measuring mRNA decay in human mitochondria. *Methods Enzymol.* 447: 489–499.
- Nilsson, P., Henriksson, N., Niedzwiecka, A., Balatsos, N.A., Kokkoris, K., Eriksson, J., et al. (2007) A multifunctional RNA recognition motif in poly(A)-specific ribonuclease with cap and poly(A) binding properties. *J. Biol. Chem.* 282: 32902–32911.
- Nishimura, N., Kitahata, N., Seki, M., Narusaka, Y., Narusaka, M., Kuromori, T., et al. (2005) Analysis of ABA hypersensitive germination2 revealed the pivotal functions of PARN in stress response in Arabidopsis. *Plant J.* 44: 972–984.
- Nishimura, N., Okamoto, M., Narusaka, M., Yasuda, M., Nakashita, H., Shinozaki, K., et al. (2009) ABA hypersensitive germination2-1 causes the activation of both abscisic acid and salicylic acid responses in Arabidopsis. *Plant Cell Physiol.* 50: 2112–2122.
- Norbury, C.J. (2013) Cytoplasmic RNA: a case of the tail wagging the dog. *Nat. Rev. Mol. Cell Biol.* 14: 643–653.
- Oda, K., Yamato, K., Ohta, E., Nakamura, Y., Takemura, M., Nozato, N., et al. (1992) Gene organization deduced from the complete sequence of liverwort *Marchantia polymorpha* mitochondrial DNA: a primitive form of plant mitochondrial genome. *J. Mol. Biol.* 223: 1–7.
- Perrin, R., Meyer, E.H., Zaepfel, M., Kim, Y.J., Mache, R., Grienemberger, J.M., et al. (2004) Two exoribonucleases act sequentially to process mature 3'-ends of atp9 mRNAs in Arabidopsis mitochondria. *J. Biol. Chem.* 279: 25440–25446.
- Reverdatto, S.V., Dutko, J.A., Chekanova, J.A., Hamilton, D.A. and Belostotsky, D.A. (2004) mRNA deadenylation by PARN is essential for embryogenesis in higher plants. *RNA* 10: 1200–1214.
- Rorbach, J., Nicholls, T.J.J. and Minczuk, M. (2011) PDE12 removes mitochondrial RNA poly(A) tails and controls translation in human mitochondria. *Nucleic Acids Res.* 39: 7750–7763.
- Salinas-Giegé, T., Cavauiolo, M., Cognat, V., Ubrig, E., Remacle, C., Duchêne, A.-M., et al. (2017) Polycytidylation of mitochondrial mRNAs in *Chlamydomonas reinhardtii*. *Nucleic Acids Res.* 45: 12963–12973.
- Shukla, S., Bjerke, G.A., Muhlrud, D., Yi, R. and Parker, R. (2019) The RNase PARN controls the levels of specific miRNAs that contribute to p53 regulation. *Mol. Cell* 73: 1204–1216.e4.
- Shukla, S., Schmidt, J.C., Goldfarb, K.C., Cech, T.R. and Parker, R. (2016) Inhibition of telomerase RNA decay rescues telomerase deficiency caused by dyskerin or PARN defects. *Nat. Struct. Mol. Biol.* 23: 286–292.
- Stuart, B.D., Choi, J., Zaidi, S., Xing, C., Holohan, B., Chen, R., et al. (2015) Exome sequencing links mutations in PARN and RTEL1 with familial pulmonary fibrosis and telomere shortening. *Nat. Genet.* 47: 512–517.
- Sugano, S.S., Nishihama, R., Shirakawa, M., Takagi, J., Matsuda, Y., Ishida, S., et al. (2018) Efficient CRISPR/Cas9-based genome editing and its application to conditional genetic analysis in *Marchantia polymorpha*. *PLoS One* 13: e0205117.
- Sugano, S.S., Shirakawa, M., Takagi, J., Matsuda, Y., Shimada, T., Hara-Nishimura, I., et al. (2014) CRISPR/Cas9-mediated targeted mutagenesis in the liverwort *Marchantia polymorpha* L. *Plant Cell Physiol.* 55: 475–481.
- Tang, W., Tu, S., Lee, H.-C., Weng, Z. and Mello, C.C. (2016) The RNase PARN-1 trims piRNA 3' ends to promote transcriptome surveillance in *C. elegans*. *Cell* 164: 974–984.
- Tomecki, R., Dmochowska, A., Gewartowski, K., Dziembowski, A. and Stepień, P.P. (2004) Identification of a novel human nuclear-encoded mitochondrial poly(A) polymerase. *Nucl Acids Res.* 32: 6001–6014.
- Unsel, M., Marienfeld, J.R., Brandt, P. and Brennicke, A. (1997) The mitochondrial genome of Arabidopsis thaliana contains 57 genes in 366, 924 nucleotides. *Nat. Genet.* 15: 57–61.
- Weill, L., Belloc, E., Bava, F.-A. and Méndez, R. (2012) Translational control by changes in poly(A) tail length: recycling mRNAs. *Nat. Struct. Mol. Biol.* 19: 577–585.
- Wilkie, G.S., Dickson, K.S. and Gray, N.K. (2003) Regulation of mRNA translation by 5'- and 3'-UTR-binding factors. *Trends Biochem. Sci.* 28: 182–188.
- Wu, M., Nilsson, P., Henriksson, N., Niedzwiecka, A., Lim, M.K., Cheng, Z., et al. (2009) Structural basis of m7GpppG binding to poly(A)-specific ribonuclease. *Structure* 17: 276–286.
- Yoda, M., Cifuentes, D., Izumi, N., Sakaguchi, Y., Suzuki, T., Giraldez, A.J., et al. (2013) Poly(A)-specific ribonuclease mediates 3'-end trimming of Argonaute2-cleaved precursor microRNAs. *Cell Rep.* 5: 715–726.
- Zimmer, S.L., Fei, Z. and Stern, D.B. (2008) Genome-based analysis of *Chlamydomonas reinhardtii* exoribonucleases and poly(A) polymerases predicts unexpected organellar and exosomal features. *Genetics* 179: 125–136.
- Zimmer, S.L., Schein, A., Zipor, G., Stern, D.B. and Schuster, G. (2009) Polyadenylation in Arabidopsis and *Chlamydomonas* organelles: the input of nucleotidyltransferases, poly(A) polymerases and polynucleotide phosphorylase. *Plant J.* 59: 88–99.
